# Supplementary material for: Heart rate reveals torpor at high body temperatures in lowland tropical free-tailed bats
Source: PubMed Central journal article supplement (PMC5750026; doi:10.1098/rsos.171359), 2017-12-20

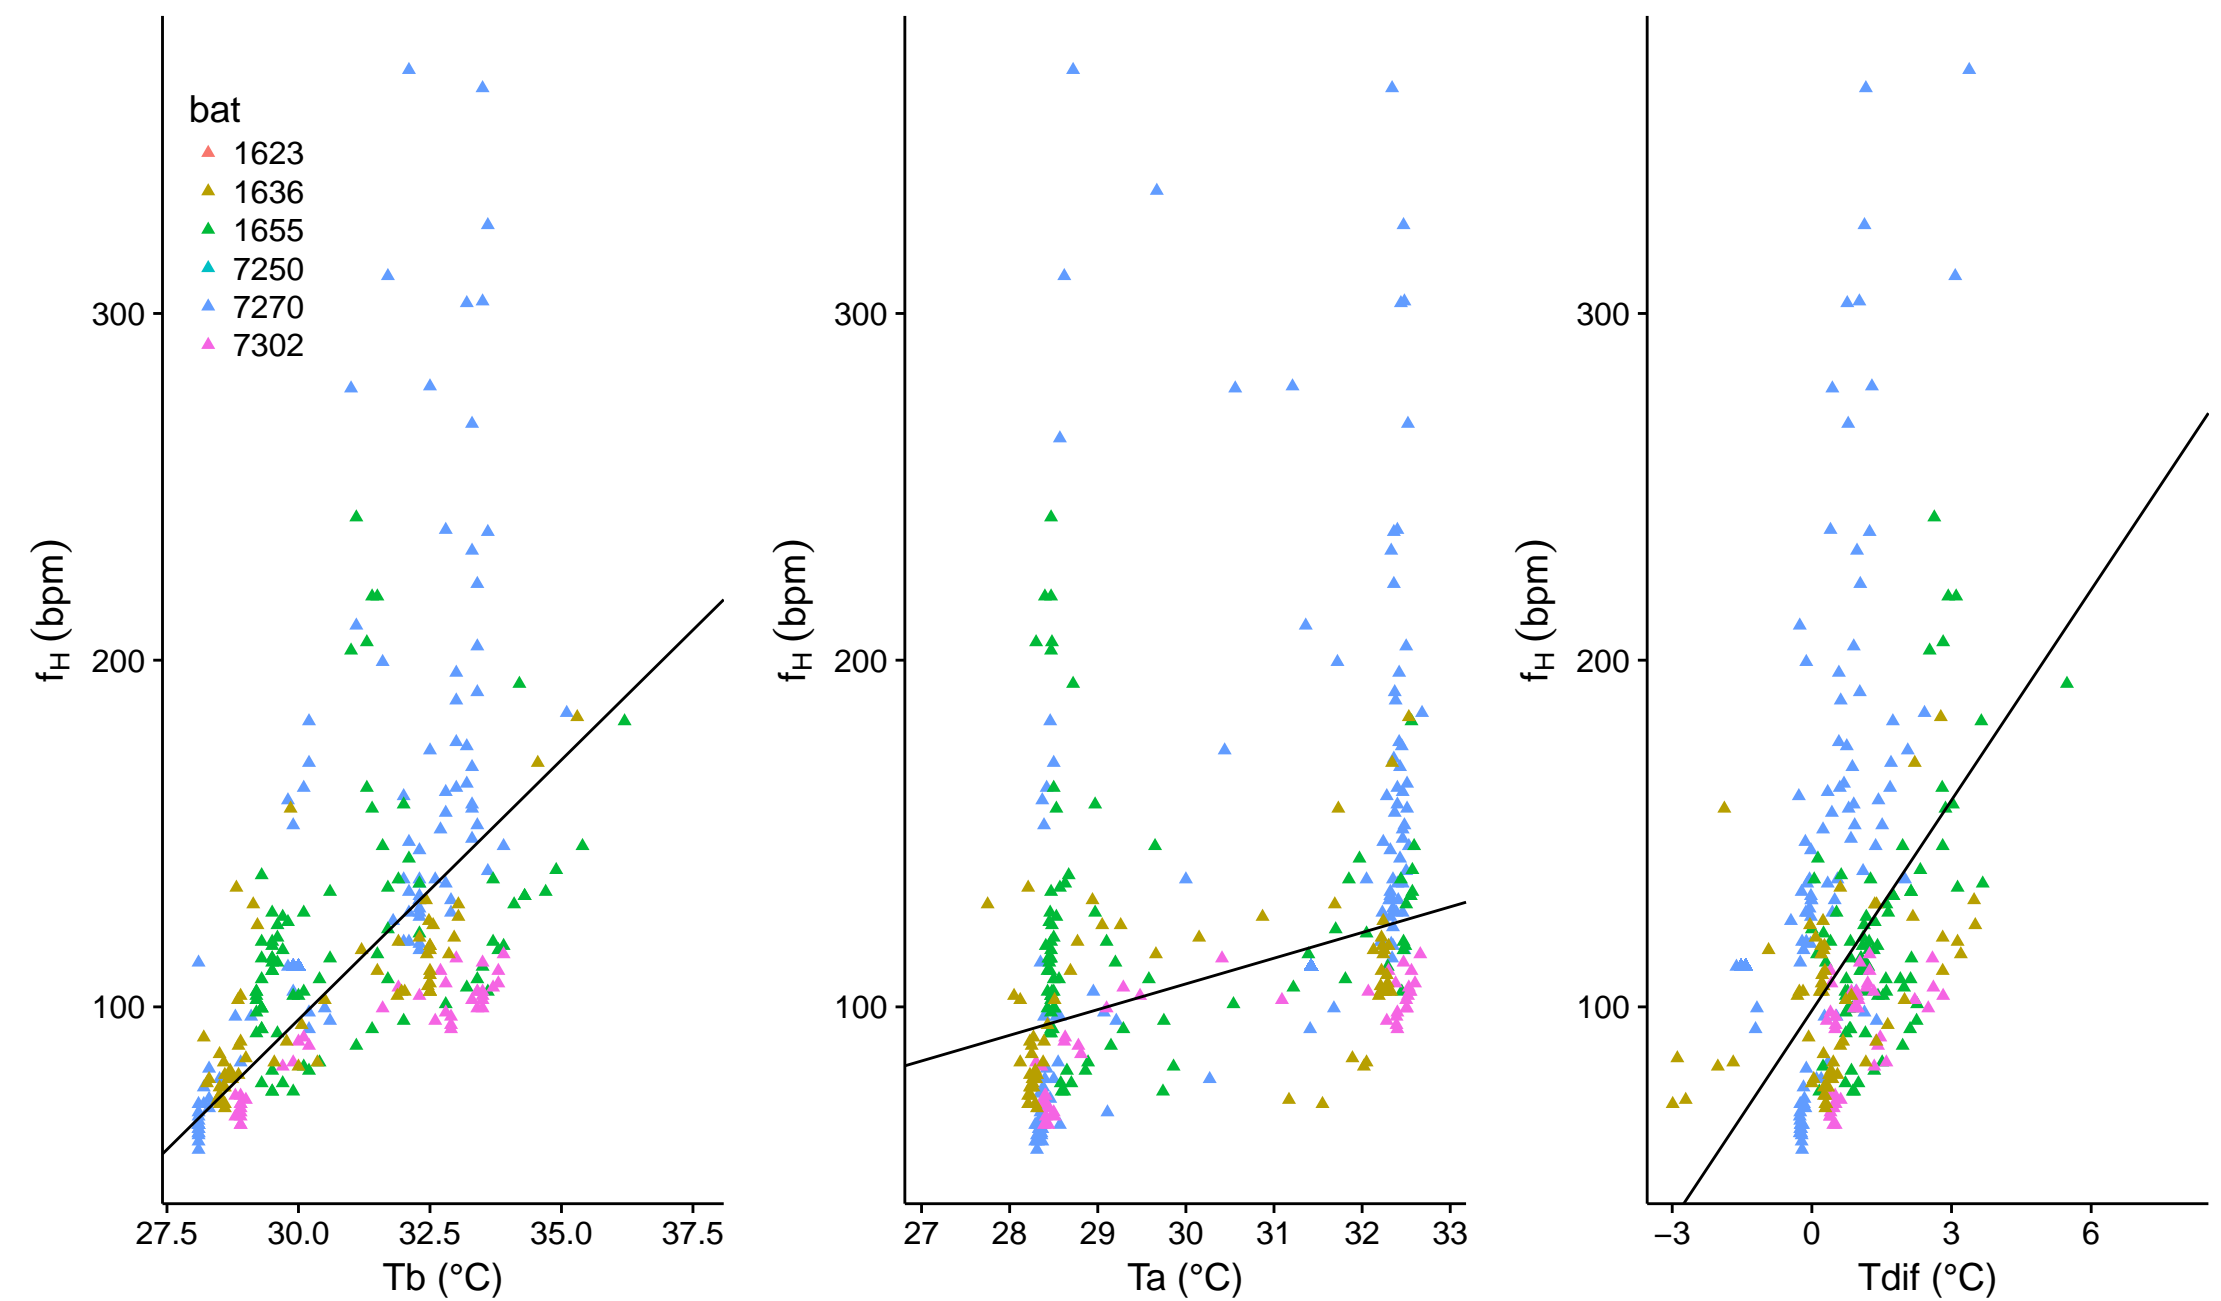

Supplement: rsos171359supp2.pdf [file rsos171359supp2.pdf]
